# Supplementary material for: Transformation of Strawberry Plants’ Phenolic Profile after Treatment with a Mechanocomposite Based on Silicon Chelates in the Course of Development under In Vitro, Ex Vitro, and In Vivo Conditions
Source: MDPI journal article supplement (doi:10.3390/horticulturae9020157), 2023-01-27
Supplement: s1 [file s1]

**Table S1.** Phenolic compounds in the aboveground part of strawberry cv. 'Solnechnaya polyanka' plants.

| Peak No. | t <sub>R</sub> , min | λ <sub>max</sub> , nm  | Compound                      |
|----------|----------------------|------------------------|-------------------------------|
| 1        | 2.4                  | 216, 272               | Gallic acids                  |
| 2        | 3.8                  | 240, 296 sh., 325      | Neochlorogenic acid           |
| 3        | 5.3                  | 204, 230 sh., 280      | (+)-Catechin                  |
| 4        | 6.8                  | 254                    | <i>p</i> -Hydroxybenzoic acid |
| 5        | 7.7                  | 204, 230 sh., 280      | Epigallocatechin gallate      |
| 6        | 8.0                  | 230, 262               | Ellagic acid derivative 1     |
| 7        | 8.7                  | 218, 240, 298 sh., 324 | Caffeic acid                  |
| 8        | 9.4                  | 260, 290               | Vanillic acid                 |
| 9        | 9.7                  | 220, 270               | Syringic acid                 |
| 10       | 10.8                 | 226, 310               | <i>p</i> -Coumaric acid       |
| 11       | 11.2                 | 230, 276               | Ellagic acid derivative 2     |
| 12       | 12.4                 | 254, 362               | Ellagic acid derivative 3     |
| 13       | 13.3                 | 218, 236, 320          | Ferulic acid                  |
| 14       | 13.8                 | 270, 355               | Quercetin glycoside 1         |
| 15       | 14.0                 | 270, 355               | Quercetin glycoside 2         |
| 16       | 16.3                 | 254, 360               | Ellagic acid derivative 4     |
| 17       | 16.8                 | 254, 360               | Ellagic acid derivative 5     |
| 18       | 17.7                 | 254, 367               | Ellagic acid                  |
| 19       | 19.2                 | 265, 356               | Kaempferol rutinoside         |

t<sub>R</sub>: retention time, λ<sub>max</sub>: absorption maxima.
